# Supplementary material for: Effect of Fibroblast Growth Factor 21 on the Development of Atheromatous Plaque and Lipid Metabolic Profiles in an Atherosclerosis-Prone Mouse Model
Source: PubMed Central journal article supplement (PMC7555741; doi:10.3390/ijms21186836), 2020-09-17
Supplement: ijms-21-06836-s001.pdf [file ijms-21-06836-s001.pdf]

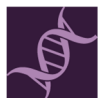

### Supplementary Materials

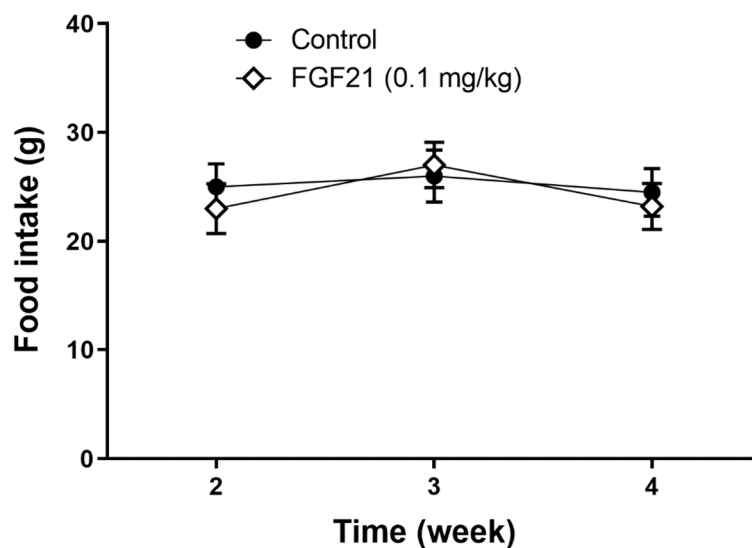

**Figure S1.** Food consumption during the study period. There was no difference in amount of food consumption between the two groups. FGF21 (fibroblast growth factor 21).

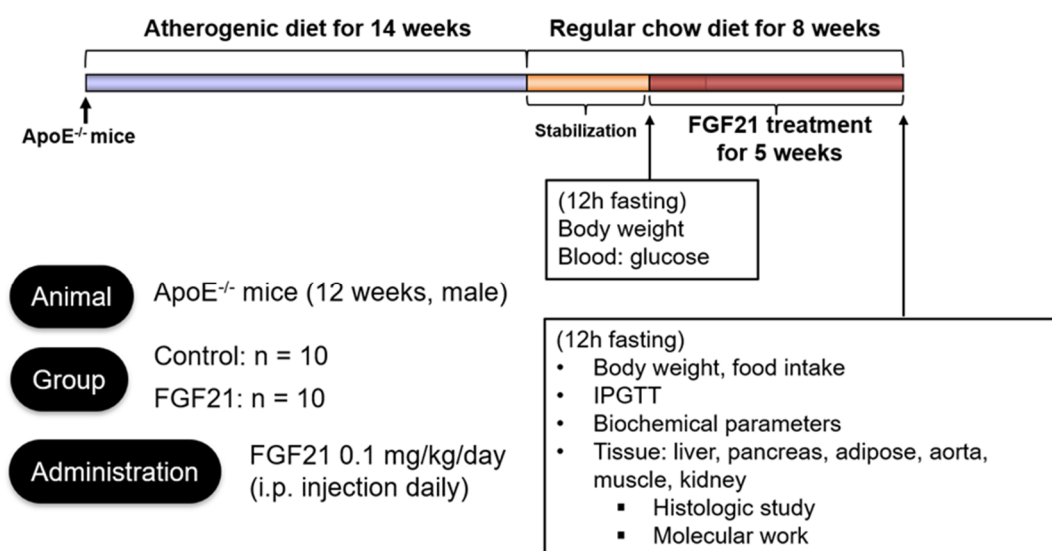

**Figure S2.** Study design. FGF21 (fibroblast growth factor 21), IPGTT (intraperitoneal glucose tolerance test).
